# Supplementary material for: T-Nb2O5 nanoparticles confined in carbon nanotubes with fast ion diffusion rates for lithium storage
Source: Royal Society of Chemistry journal article supplement (doi:10.1039/d1dt02735b), 2021-01-01
Supplement: d1dt02735b1.pdf [file d1dt02735b1.pdf]

## Electronic Supplementary Information

### **T-Nb<sub>2</sub>O<sub>5</sub> nanoparticles confined in carbon nanotubes with fast ion diffusion rate as lithium storage**

Yang Zhang, Yakun Tang, Lang Liu\*, Yue Zhang, Zhiguo Li

*State Key Laboratory of Chemistry and Utilization of Carbon Based Energy Resources;*

*College of Chemistry, Institute of Applied Chemistry, Xinjiang University, Urumqi, 8300*

*46, Xinjiang, PR China.*

Corresponding author's E-mail: [liulang@xju.edu.cn](mailto:liulang@xju.edu.cn)

## Material characterization

Compositions of **samples** were characterized by X-ray diffraction (XRD; Bruker D8/Cu K $\alpha$  radiation). Morphology analysis was conducted by utilizing Hitachi's field-emission scanning electron microscopy (SEM, S-4800) and transmission electron microscopy and high resolution transmission electron microscope (HRTEM, JEOL JEM-2010F). Thermogravimetric analysis (TGA) was conducted by the Netzsch STA 449C from room temperature to 800 °C with a heating rate of 10 °C min<sup>-1</sup>. Brunauer-Emmett-Teller (BET) specific surface area and pore structure analysis (DFT method) **were** measured by nitrogen adsorption/desorption with an Autosorb-iQ Pressure Sorption Analyzer (Quantachrome Instruments USA) at 77 K. The preparation of the working electrodes follows the previous procedure.<sup>1,2</sup> Cyclic voltammetry curves were accounted on a CHI-660C workstation with a sweep rate of 0.1 mV s<sup>-1</sup>. Galvanostatic charge and discharge processes were conducted on a Land (CT2001A China) at 0.01-3.00 V (versus Li<sup>+</sup>/Li). The mass loading of the T-Nb<sub>2</sub>O<sub>5</sub>/CNT active material is 0.968 and 0.992 mg for LIBs and SIBs, respectively.

### Explanation on equation:

$$i = av^b \quad (1)$$

$a$  and  $b$  are changeable factors. The  $b$  value of 0.5 shows that the  $\text{Li}^+$  storage is completely regulated by the diffusion controlled process, whereas a  $b$  value of 1 means that the surface-controlled process completely occupies a dominant position.

### Determination of diffusion coefficient

$$i_p = (2.69 \times 10^5)n^{3/2}AD^{1/2}Cv^{1/2} \quad (2)$$

$i_p$ : peak current (A)

$n$ : the transferred number of electrons in the electrochemical reaction

$A$ : the surface area of the electrode ( $1.13 \text{ cm}^2$ )

$D$ : the  $\text{Li}^+$  diffusion coefficient of the active material

$C$ : the concentration of lithium ions in the anode

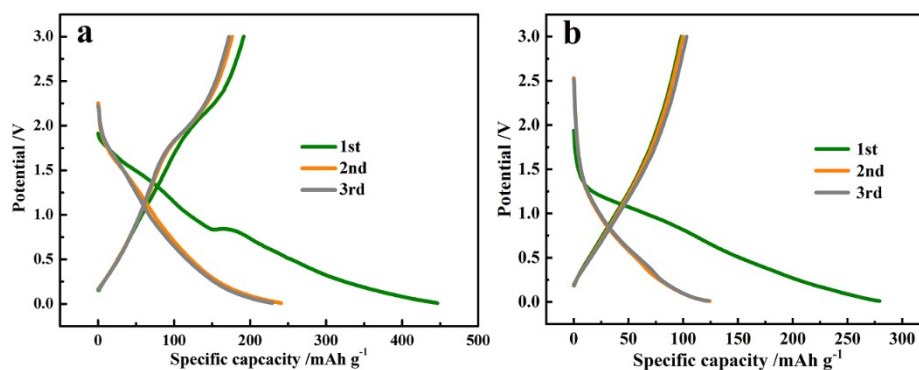

**Figure S1.** Galvanostatic charge-discharge curves for the first three cycles of T-Nb<sub>2</sub>O<sub>5</sub>/CNT for LIBs at 0.4 A g<sup>-1</sup> (a) and SIBs at 0.1 A g<sup>-1</sup> (b).

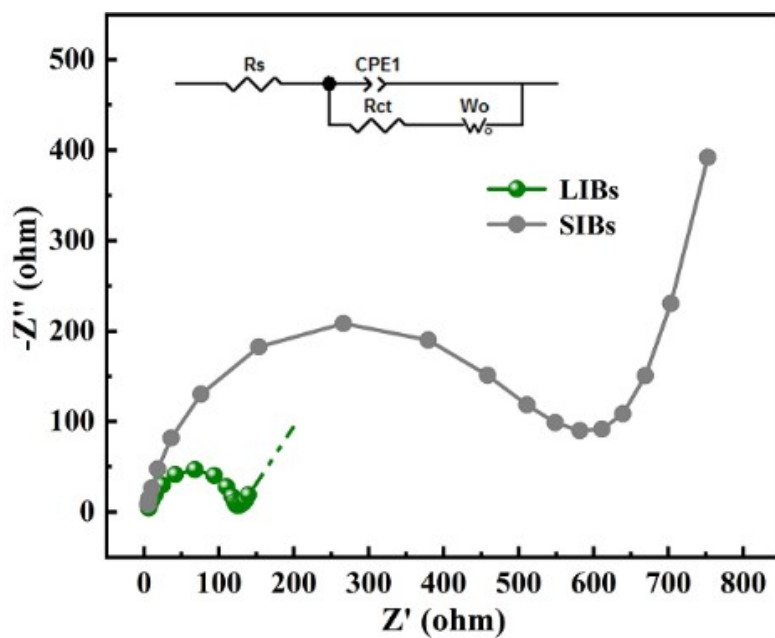

**Figure S2.** Electrochemical impedance spectra of T-Nb<sub>2</sub>O<sub>5</sub>/CNT for LIBs and SIBs.

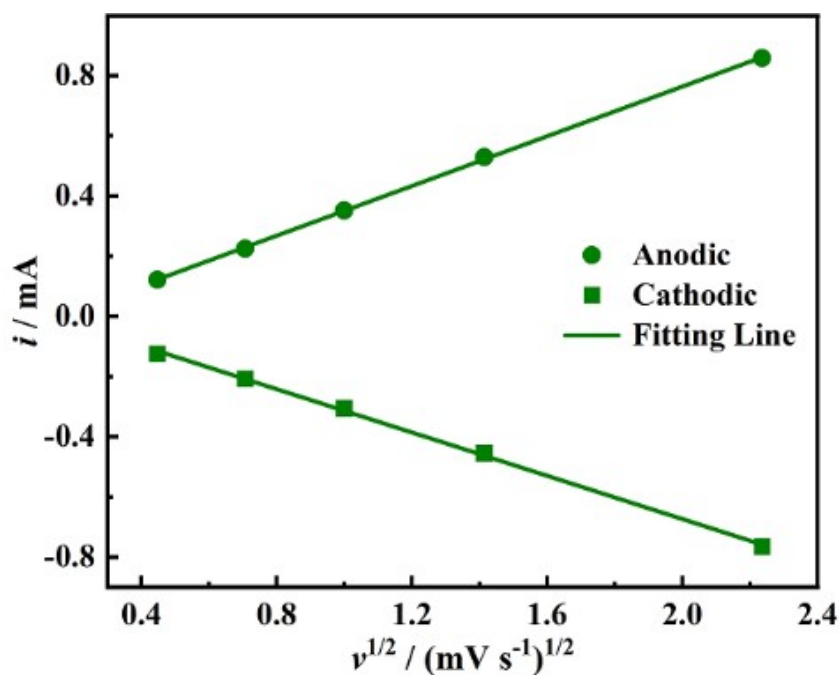

**Figure S3.** Relationship between peak current ( $i$ ) and the square root of the scan rate ( $v^{1/2}$ ) of the T-Nb<sub>2</sub>O<sub>5</sub>/CNT electrode.

**Table S1.** Comparison of Li<sup>+</sup> diffusion coefficient for different niobium-based anodes.

| Materials                                                   | $D_{\text{Li}^+}(\text{cm}^2/\text{s}, \text{lithiation})$ | $D_{\text{Li}^+}(\text{cm}^2/\text{s}, \text{delithiation})$ | Ref  |
|-------------------------------------------------------------|------------------------------------------------------------|--------------------------------------------------------------|------|
| TiCr <sub>0.5</sub> Nb <sub>10.5</sub> O <sub>29</sub> /CNT | $3.34 \times 10^{-14}$                                     | $3.41 \times 10^{-14}$                                       | 3    |
| s                                                           |                                                            |                                                              |      |
| TiNb <sub>2</sub> O <sub>7</sub> /CNTs                      | $9.27 \times 10^{-16}$                                     | $1.37 \times 10^{-15}$                                       | 4    |
| TiNb <sub>6</sub> O <sub>17</sub>                           | $4.28 \times 10^{-14}$                                     | $5.48 \times 10^{-14}$                                       | 5    |
| CrNb <sub>11</sub> O <sub>29</sub>                          | $1.51 \times 10^{-13}$                                     | $3.57 \times 10^{-13}$                                       | 6    |
| Ti <sub>2</sub> Nb <sub>14</sub> O <sub>39</sub>            | $9.07 \times 10^{-14}$                                     | $5.52 \times 10^{-14}$                                       | 7    |
| M-MoNb <sub>12</sub> O <sub>33</sub>                        | $4.0 \times 10^{-14}$                                      | $8.6 \times 10^{-14}$                                        | 8    |
| N-GeNb <sub>18</sub> O <sub>47</sub>                        | $1.596 \times 10^{-15}$                                    | $1.552 \times 10^{-15}$                                      | 9    |
| TiNb <sub>2</sub> O <sub>7</sub> @C                         | $2.39 \times 10^{-12}$                                     | $2.13 \times 10^{-12}$                                       | 10   |
| Mg <sub>2</sub> Nb <sub>34</sub> O <sub>87</sub>            | $3.23 \times 10^{-13}$                                     | $6.36 \times 10^{-13}$                                       | 11   |
| Cu <sub>2</sub> Nb <sub>34</sub> O <sub>87</sub>            | $3.1 \times 10^{-13}$                                      | $3.9 \times 10^{-13}$                                        | 12   |
| T-Nb <sub>2</sub> O <sub>5</sub> /CNT                       | $6.61 \times 10^{-12}$                                     | $4.98 \times 10^{-12}$                                       | This |

## Reference

- 1 Y. Tang, L. Liu, H. Zhao, L. Kong, Z. Guo, S. Gao, Y. Che, L. Wang, D. Jia, Rational design of hybrid porous nanotubes with robust structure of ultrafine  $\text{Li}_4\text{Ti}_5\text{O}_{12}$  nanoparticles embedded in bamboo-like CNTs for superior lithium ion storage. *J. Mater. Chem. A* 2018, 6, 3342-3349.
- 2 Y. Zhang, Y. Tang, S. Gao, D. Jia, J. Ma, L. Liu, Sandwich-like  $\text{CNT}@\text{Fe}_3\text{O}_4@\text{C}$  coaxial nanocables with enhanced lithium-storage capability. *ACS Appl. Mater. Interfaces* 2017, 9, 1453-1458.
- 3 L. Hu, R. H. Lu, L. F. Tang, R. Xia, C. F. Lin, Z. B. Luo, Y. J. Chen, J. B. Li,  $\text{TiCr}_{0.5}\text{Nb}_{10.5}\text{O}_{29}/\text{CNTs}$  nanocomposite as an advanced anode material for high-performance  $\text{Li}^+$ -ion storage, *J. Alloys Compd.* 2018, 732, 116-123.
- 4 C. F. Lin, L. Hu, C. B. Cheng, K. Sun, X. K. Guo, Q. Shao, J. B. Li, N. Wang, Z. H. Guo, Nano- $\text{TiNb}_2\text{O}_7$ /carbon nanotubes composite anode for enhanced lithium-ion storage, *Electrochim. Acta* 2018, 260, 65-72.
- 5 C. F. Lin, G. Z. Wang, S. W. Lin, J. B. Li, L. Lu,  $\text{TiNb}_6\text{O}_{17}$ : a new electrode material for lithium-ion batteries, *Chem. Commun.* 2015, 51, 8970-8973.
- 6 Q. F. Fu, X. Liu, J. R. Hou, Y. R. Pu, C. F. Lin, L. Yang, X. Z. Zhu, L. Hu, S. W. Lin, L. J. Luo, Y. J. Chen, Highly conductive  $\text{CrNb}_{11}\text{O}_{29}$  nanorods for use in high-energy, safe, fast-charging and stable lithium-ion batteries, *J. Power Sources* 2018, 397, 2018 231-239.
- 7 C. F. Lin, S. J. Deng, D. J. Kautz, Z. H. Xu, T. Liu, J. B. Li, N. Wang, F. Lin, Intercalating  $\text{Ti}_2\text{Nb}_{14}\text{O}_{39}$  anode materials for fast-charging, high-capacity and safe lithium-ion batteries, *Small* 2017, 13, 1702903-1702910.
- 8 X. Z. Zhu, J. Xu, Y. P. Luo, Q. F. Fu, G. S. Liang, L. J. Luo, Y. J. Chen, C. F. Lin, X. S. Zhao,  $\text{MoNb}_{12}\text{O}_{33}$  as a new anode material for high-capacity, safe, rapid and

durable Li<sup>+</sup> storage: structural characteristics, electrochemical properties and working mechanisms, *J. Mater. Chem. A* 2019, 7, 6522-6532.

9 F. M. Ran, X. Cheng, H. X. Yu, R. T. Zheng, T. T. Liu, X. F. Li, N. Ren, M. Shui, J. Shu, Nano-structured GeNb<sub>18</sub>O<sub>47</sub> as novel anode host with superior lithium storage performance, *Electrochim. Acta* 2018, 282, 634-641.

10 H. Lyu, J. L. Li, T. Wang, B. P. Thapaliya, S. Meng, C. J. Jafta, R. M. Tao, X. G. Sun, S. Dai, Carbon coated porous titanium niobium oxides as anode materials of lithium-ion batteries for extreme fast charge applications, 2020, 3, *ACS Appl. Energy Mater.* 5657-5665.

11 X. Z. Zhu, Q. F. Fu, L. F. Tang, C. F. Lin, J. Xu, G. S. Liang, R. J. Li, L. J. Luo, Y. J. Chen, Mg<sub>2</sub>Nb<sub>34</sub>O<sub>87</sub> porous microspheres for use in high-energy, safe, fast-charging, and stable lithium-ion batteries, *ACS Appl. Mater. Interfaces* 2018, 10, 23711-23720.

12 L. T. Yang, X. Z. Zhu, X. H. Li, X. B. Zhao, K. Pei, W. B. You, X. Li, Y. J. Chen, C. F. Lin, R. C. Che, Conductive copper niobate: superior Li<sup>+</sup>-storage capability and novel Li<sup>+</sup>-transport mechanism, *Adv. Energy Mater.* 2019, 9, 1902174-1902183.
