# Supplementary figures and images for: T-Nb2O5 nanoparticles confined in carbon nanotubes with fast ion diffusion rates for lithium storage
Source: Royal Society of Chemistry journal article supplement (doi:10.1039/d1dt02735b), 2021-01-01

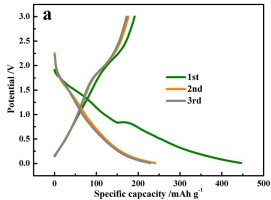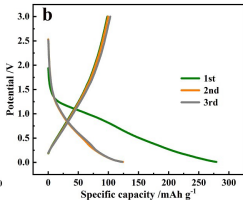

Supplement: d1dt02735b3.pdf [file d1dt02735b3.pdf]
